# Supplementary material for: Comparative Transcriptome and Expression Profiling of Resistant and Susceptible Banana Cultivars during Infection by Fusarium oxysporum
Source: PubMed Central journal article supplement (PMC7999991; doi:10.3390/ijms22063002), 2021-03-16
Supplement: ijms-22-03002-s001.pdf [file ijms-22-03002-s001.pdf]

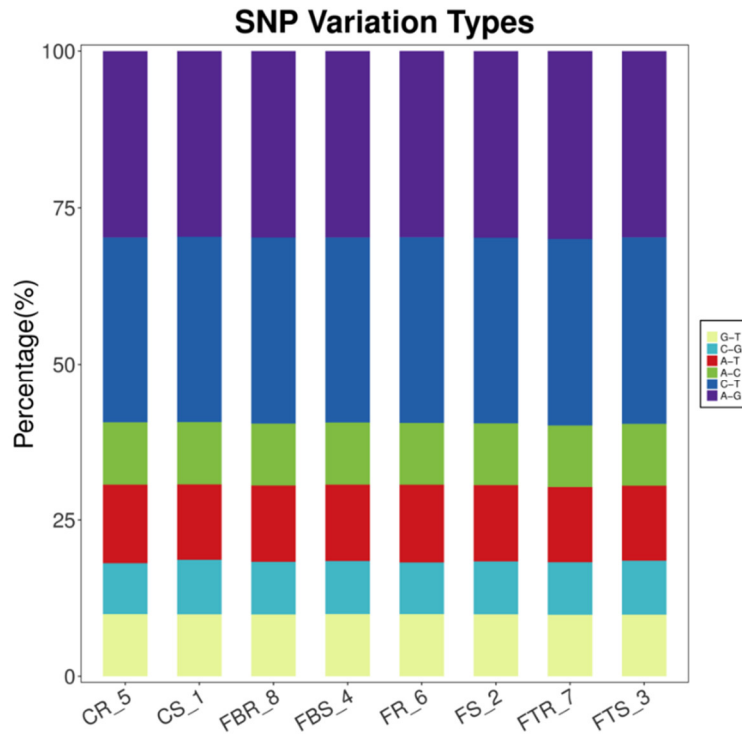

**Supplementary Figure 1.** SNP variant type distribution of susceptible and resistant banana cultivars. X axis represents the type of SNP. Y axis represents the number of SNP. CS1 (control susceptible), FS2 (*Fusarium* susceptible), FTS3 (*Fusarium Trichoderma* susceptible) and FBS4 (*Fusarium Bacillus* susceptible) for Mchare and CR5 (control resistant), FR6 (*Fusarium* resistant), FTR7 (*Fusarium Trichoderma* resistant) and FBR8 (*Fusarium Bacillus* resistant) for Grand Naine.

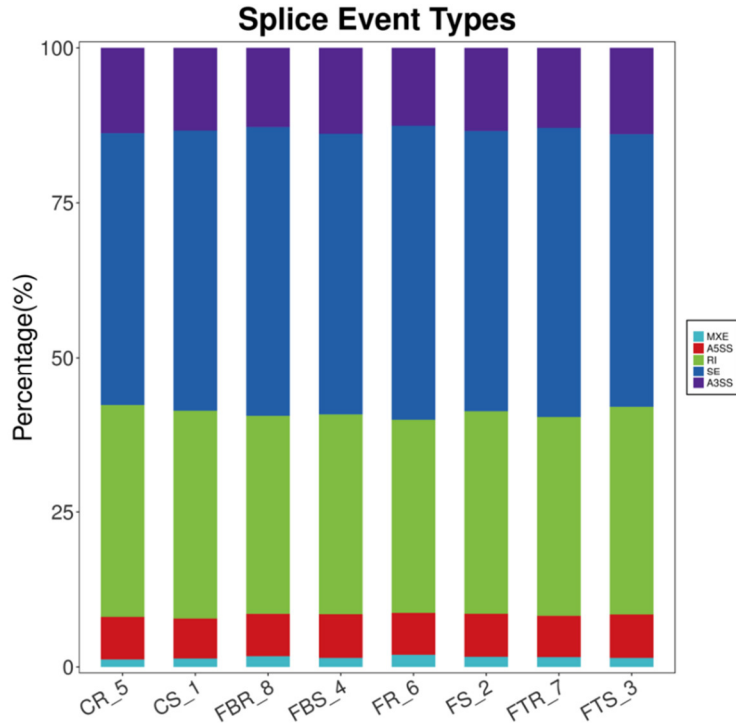

**Supplementary Figure 2.** Splice event types of susceptible and resistant banana cultivars. X axis means the type of splicing. Y axis means the amount. Different columns represent different splicing events. CS1 (control susceptible), FS2 (*Fusarium* susceptible), FTS3 (*Fusarium Trichoderma* susceptible) and FBS4 (*Fusarium Bacillus* susceptible) for Mchare and CR5 (control resistant), FR6 (*Fusarium* resistant), FTR7 (*Fusarium Trichoderma* resistant) and FBR8 (*Fusarium Bacillus* resistant) for Grand Naine.

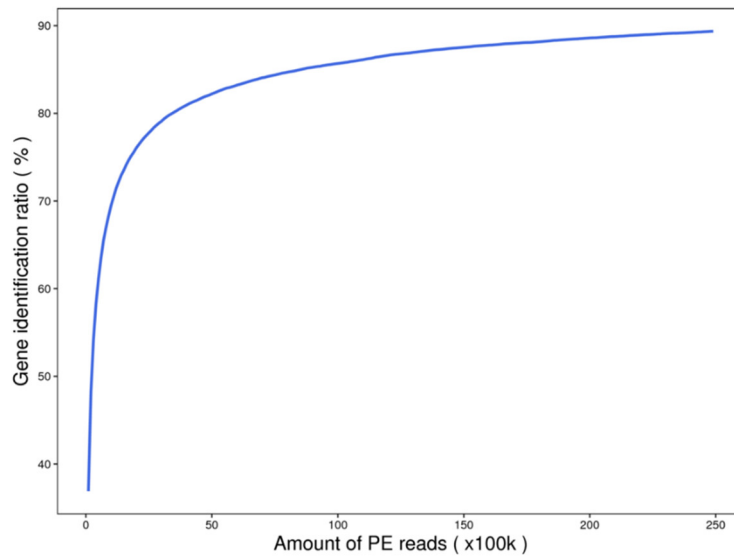

**Supplementary Figure 3.** Sequencing saturation of susceptible and resistant banana cultivars. The X axis represents the number of clean reads, in units of 100k; the Y axis indicates the number of detected genes, in units of %.

**Supplementary Table 1.** Clean reads quality metrics

| Sample | Total Raw Reads (M) | Total Clean Reads (M) | Total Clean Bases (Gb) | Clean Reads Q20 (%) | Clean Reads Q30 (%) | Clean Reads Ratio (%) |
|--------|---------------------|-----------------------|------------------------|---------------------|---------------------|-----------------------|
| CR_5   | 50.17               | 49.67                 | 4.97                   | 98.33               | 92.46               | 99.01                 |
| CS_1   | 50.17               | 49.57                 | 4.96                   | 98.36               | 92.78               | 98.81                 |
| FBR_8  | 50.17               | 49.71                 | 4.97                   | 98.22               | 92.35               | 99.09                 |
| FBS_4  | 50.17               | 49.32                 | 4.93                   | 98.32               | 92.62               | 98.31                 |
| FR_6   | 50.17               | 49.74                 | 4.97                   | 98.23               | 92.33               | 99.16                 |
| FS_2   | 50.17               | 49.71                 | 4.97                   | 98.14               | 92.03               | 99.08                 |
| FTR_7  | 50.17               | 49.69                 | 4.97                   | 98.18               | 92.14               | 99.05                 |
| FTS_3  | 50.17               | 49.44                 | 4.94                   | 98.25               | 92.53               | 98.54                 |

CS1 (control susceptible), FS2 (*Fusarium* susceptible), FTS3 (*Fusarium Trichoderma* susceptible) and FBS4 (*Fusarium Bacillus* susceptible) for Mchare and CR5 (control resistant), FR6 (*Fusarium* resistant), FTR7 (*Fusarium Trichoderma* resistant) and FBR8 (*Fusarium Bacillus* resistant) for Grand Naine.

**Supplementary Table 2.** Summary of Genome Mapping

| Sample | Total Clean Reads | Total Mapping Ratio (%) | Uniquely Mapping Ratio (%) |
|--------|-------------------|-------------------------|----------------------------|
| CR_5   | 49,669,582        | 27.27                   | 19.92                      |
| CS_1   | 49,571,706        | 31.33                   | 23.14                      |
| FBR_8  | 49,711,170        | 26.06                   | 18.73                      |
| FBS_4  | 49,318,444        | 30.45                   | 22.34                      |
| FR_6   | 49,744,462        | 29.92                   | 21.71                      |
| FS_2   | 49,708,094        | 31.25                   | 22.83                      |
| FTR_7  | 49,690,694        | 27.99                   | 20.27                      |
| FTS_3  | 49,436,120        | 32.37                   | 23.72                      |

CS1 (control susceptible), FS2 (*Fusarium* susceptible), FTS3 (*Fusarium Trichoderma* susceptible) and FBS4 (*Fusarium Bacillus* susceptible) for Mchare and CR5 (control resistant), FR6 (*Fusarium* resistant), FTR7 (*Fusarium Trichoderma* resistant) and FBR8 (*Fusarium Bacillus* resistant) for Grand Naine.

| Sample | SE    | MXE | A5SS | A3SS | RI    |
|--------|-------|-----|------|------|-------|
| CR_5   | 1,308 | 36  | 204  | 409  | 1,016 |
| CS_1   | 1,305 | 39  | 186  | 384  | 964   |
| FBR_8  | 1,424 | 53  | 208  | 389  | 973   |
| FBS_4  | 1,399 | 45  | 217  | 427  | 992   |
| FR_6   | 1,500 | 62  | 213  | 396  | 982   |
| FS_2   | 1,379 | 50  | 211  | 407  | 993   |
| FTR_7  | 1,446 | 49  | 206  | 399  | 991   |
| FTS_3  | 1,297 | 43  | 206  | 409  | 984   |

**Supplementary Table 3.** SNP variant type summary (IR: intron retention, A3SS: alternative 3' splice sites, A5SS: alternative 5' splice sites, SE, skipping exon, AFE: alternative first exons, ALE: alternative last exons, CSE: coordinated skipping exons, MXE: mutually exclusive exons)

CS1 (control susceptible), FS2 (*Fusarium* susceptible), FTS3 (*Fusarium Trichoderma* susceptible) and FBS4 (*Fusarium Bacillus* susceptible) for Mchare and CR5 (control resistant), FR6 (*Fusarium* resistant), FTR7 (*Fusarium Trichoderma* resistant) and FBR8 (*Fusarium Bacillus* resistant) for Grand Naine.

**Supplementary Table 4.** SNP variant type summary

| Sample | A-G     | C-T     | Transition | A-C    | A-T    | C-G    | G-T    | Transversion | Total   |
|--------|---------|---------|------------|--------|--------|--------|--------|--------------|---------|
| CR_5   | 146,763 | 146,414 | 293,177    | 49,251 | 62,089 | 40,208 | 49,078 | 200,626      | 493,803 |
| CS_1   | 103,564 | 103,936 | 207,500    | 34,834 | 42,155 | 30,483 | 34,663 | 142,135      | 349,635 |
| FBR_8  | 116,301 | 116,714 | 233,015    | 38,730 | 47,659 | 32,917 | 38,674 | 157,980      | 390,995 |
| FBS_4  | 120,238 | 120,035 | 240,273    | 40,208 | 49,354 | 34,312 | 40,224 | 164,098      | 404,371 |
| FR_6   | 122,022 | 122,398 | 244,420    | 40,632 | 51,063 | 33,942 | 40,844 | 166,481      | 410,901 |
| FS_2   | 114,896 | 114,882 | 229,778    | 38,148 | 47,056 | 32,696 | 38,259 | 156,159      | 385,937 |
| FTR_7  | 124,904 | 124,773 | 249,677    | 41,021 | 50,117 | 35,016 | 40,999 | 167,153      | 416,830 |
| FTS_3  | 105,723 | 106,507 | 212,230    | 35,246 | 42,648 | 30,717 | 35,101 | 143,712      | 355,942 |

CS1 (control susceptible), FS2 (*Fusarium* susceptible), FTS3 (*Fusarium Trichoderma* susceptible) and FBS4 (*Fusarium Bacillus* susceptible) for Mchare and CR5 (control resistant), FR6 (*Fusarium* resistant), FTR7 (*Fusarium Trichoderma* resistant) and FBR8 (*Fusarium Bacillus* resistant) for Grand Naine.

**Supplementary Table 5.** Summary of gene mapping ratio

| Sample | Total Clean Reads | Total Mapping Ratio (%) | Uniquely Mapping Ratio (%) | Total Gene Number | Total Transcript Number |
|--------|-------------------|-------------------------|----------------------------|-------------------|-------------------------|
| CR_5   | 49,669,582        | 31.67                   | 21.03                      | 37,710            | 37,710                  |
| CS_1   | 49,571,706        | 41.38                   | 26.41                      | 37,820            | 37,820                  |
| FBR_8  | 49,711,170        | 32.78                   | 21.75                      | 36,393            | 36,393                  |
| FBS_4  | 49,318,444        | 38.45                   | 24.92                      | 38,055            | 38,055                  |
| FR_6   | 49,744,462        | 37.47                   | 24.99                      | 35,966            | 35,966                  |
| FS_2   | 49,708,094        | 41.11                   | 27.03                      | 37,352            | 37,352                  |
| FTR_7  | 49,690,694        | 35.05                   | 23.09                      | 37,625            | 37,625                  |
| FTS_3  | 49,436,120        | 43.2                    | 28.04                      | 37,792            | 37,792                  |

CS1 (control susceptible), FS2 (*Fusarium* susceptible), FTS3 (*Fusarium Trichoderma* susceptible) and FBS4 (*Fusarium Bacillus* susceptible) for Mchare and CR5 (control



resistant), FR6 (*Fusarium* resistant), FTR7 (*Fusarium Trichoderma* resistant) and FBR8 (*Fusarium Bacillus* resistant) for Grand Naine.

**Supplementary Table 6.** Genes and transcripts statistics

| Sample | Total Gene Number | Total Transcript Number |
|--------|-------------------|-------------------------|
| CR_5   | 37,710            | 37,710                  |
| CS_1   | 37,820            | 37,820                  |
| FBR_8  | 36,393            | 36,393                  |
| FBS_4  | 38,055            | 38,055                  |
| FR_6   | 35,966            | 35,966                  |
| FS_2   | 37,352            | 37,352                  |
| FTR_7  | 37,625            | 37,625                  |
| FTS_3  | 37,792            | 37,792                  |

CS1 (control susceptible), FS2 (*Fusarium* susceptible), FTS3 (*Fusarium Trichoderma* susceptible) and FBS4 (*Fusarium Bacillus* susceptible) for Mchare and CR5 (control resistant), FR6 (*Fusarium* resistant), FTR7 (*Fusarium Trichoderma* resistant) and FBR8 (*Fusarium Bacillus* resistant) for Grand Naine.
